# Supplementary material for: Nitrogen-doped carbon dots decorated on graphene: a novel all-carbon hybrid electrocatalyst for enhanced oxygen reduction reaction
Source: Royal Society of Chemistry journal article supplement (doi:10.1039/c4cc08735f), 2015-01-01
Supplement: c4cc08735f1.pdf [file c4cc08735f1.pdf]

## **Supporting Information for**

### **Nitrogen-doped carbon dots decorated onto graphene: a novel all-carbon hybrid electrocatalyst for enhanced oxygen reduction reaction**

**Chao Hu, Chang Yu, Mingyu Li, Xiuna Wang, Qiang Dong, Gang Wang, Jieshan Qiu\***

*Carbon Research Laboratory, Liaoning Key Lab for Energy Materials and Chemical Engineering,  
State Key Lab of Fine Chemicals, School of Chemical Engineering, Dalian University of  
Technology, Dalian, 116024 (P. R. China); E-mail: jqiu@dlut.edu.cn*

## Experimental Details

**Synthesis.** The carbon source, coal, was first crushed and sieved to smaller than 150  $\mu\text{m}$ , then mixed with coal tar and pressed into a tube mould under a pressure of 1.0–5.0 MPa to form rods that were then carbonized at 900  $^{\circ}\text{C}$  for 2 h yielding conductive and self-supporting carbon rods. The coal-based carbon rods were electro-oxidized at +9 V (vs. SCE) in 0.1 M NaOH aqueous solution with 0.5 M ammonia. The electrolyte was neutralized with hydrochloric acid (0.1 M). The N-CDs was collected by centrifugation of the supernatant at 9,000 rpm for 10 min and then loaded into dialysis bags for dialysis against DI water for 3 d. For comparison, the nitrogen-free CDs were also prepared under the same conditions, but etched from the coal-based rod in 0.1 M NaOH electrolyte without ammonia.

The N-CDs/G hybrid was synthesized as follows. 2 mL 4 mg/mL of graphene oxide were added into 6 mL of DI water, followed by addition of 2 mL of N-CDs hydrosol. The mixture was homogeneous mixed and loaded into a Teflon-lined stainless steel autoclave and heated at 180  $^{\circ}\text{C}$  for 12 h. The product was washed with water and ethanol, and freeze-dried.

**Characterization.** The morphology and structure of the samples were investigated using a transmission electron microscopy (TEM, Philips Tecnai G2 20) at an acceleration voltage of 100 kV. Samples for the TEM measurements were prepared by dispersing in alcohol with ultrasonic treatment. The X-ray photoelectron spectra (XPS) were obtained using a Thermo ESCALAB 250 spectrometer with an Al-K $\alpha$  X-ray source. Raman spectra were recorded on a DXR Raman Microscope (Thermo Scientific) with an excitation wavelength of 532 nm.

**Electrode preparation and electrochemical measurements.** Cyclic voltammetry (CV) measurements were performed using a computer-controlled potentiostat (CHI 760 D, Shanghai Chenhua) in a standard three-electrode cell. Electrocatalysts loaded on a glassy carbon disk (diameter: 5 mm) were used as working electrode, a Pt wire as counter electrode, and an Ag/AgCl (3.5 M KCl filled) electrode as reference electrode. Measurements on rotating disk electrode (RDE) were carried out on a MSR electrode rotator (Pine Instrument) and CHI 760 D potentiostat. For all CV and RDE measurements, an aqueous solution of KOH (0.1 M) was used as the electrolyte. Ar or O<sub>2</sub> was used to purge the solution to achieve the oxygen-free or oxygen-saturated electrolyte solution. The voltammetric stability test of N-CDs/G was performed in O<sub>2</sub>-saturated 0.1 M KOH for 20,000 s, at a rotation speed of 1,000 rpm. Commercial 20 wt.% Pt/C (Johnson Matthey, Hispec 3000) catalyst was purchased and used for comparison. All electrochemical data were obtained at the temperature of 10  $^{\circ}\text{C}$ .

The working electrode was prepared as follows: Glassy carbon (GC) electrode was polished before each experiment with an alumina slurry (0.3  $\mu\text{m}$  and 0.05  $\mu\text{m}$ ) in sequence, and moderately ultrasonically cleaned with pure water. Then, 10  $\mu\text{L}$  of catalyst suspension (1 mg/mL) in water and 5  $\mu\text{L}$  of 0.1 wt.% Nafion solution in

alcohol were sequentially dropped onto the surface of the clean GC electrode, and dried at the ambient temperature.

Electron transfer number was analyzed on the basis of Koutecky-Levichequations:

$$j^{-1} = j_L^{-1} + j_K^{-1} = (B\omega^{1/2})^{-1} + j_K^{-1} \quad (1)$$

$$B = 0.2nFC_0(D_0)^{2/3}\nu^{-1/6} \quad (2)$$

Where  $j$  is the measured current density,  $j_L$  and  $j_K$  are the diffusion- and kinetic-limiting current densities,  $\omega$  is the angular velocity of the disk (rpm),  $n$  is the overall number of electrons transferred in oxygen reduction,  $F$  is the Faraday constant ( $F=96485 \text{ C mol}^{-1}$ ),  $C_0$  is the bulk concentration of  $\text{O}_2$ , ( $C_0=1.2\times 10^{-6} \text{ mol cm}^{-3}$ ),  $\nu$  is the kinematic viscosity of the electrolyte ( $\nu=0.01 \text{ cm}^2 \text{ s}^{-1}$ ),  $D_0$  is the diffusion coefficient of  $\text{O}_2$  in 0.1 M KOH ( $1.9\times 10^{-5} \text{ cm}^2 \text{ s}^{-1}$ ). According to Equation (1) and (2), the number of electrons transferred ( $n$ ) can be calculated to be 4.0 at -0.7 V, which indicates the N-CDs/G lead to a four-electron-transfer reaction to reduce directly oxygen into  $\text{OH}^-$ .

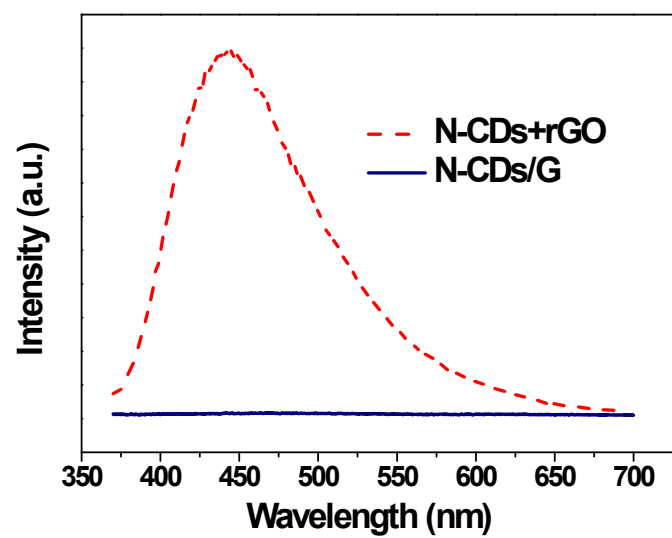

**Fig. S1** Photoluminescence (PL) response of N-CDs and rGO under two different types of interactions. The mixture of N-CDs and rGO shows a notable PL emission (dashed line) at excitation of 340 nm, whereas the PL of the N-CDs/G hybrid (solid line) is quenched, implying the well-bonded interactions between N-CDs and rGO.

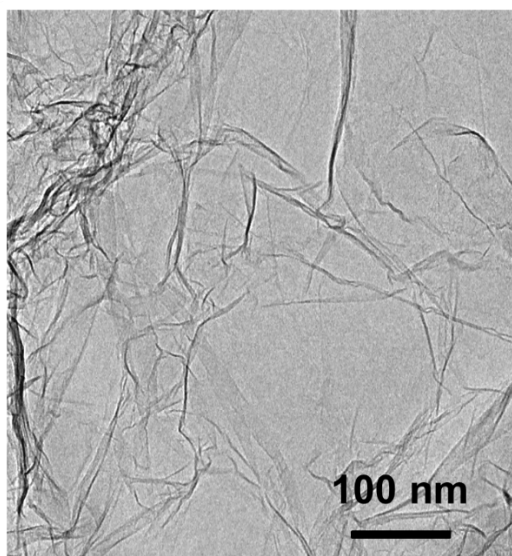

**Fig. S2** TEM image of the reduced graphene oxide (rGO).

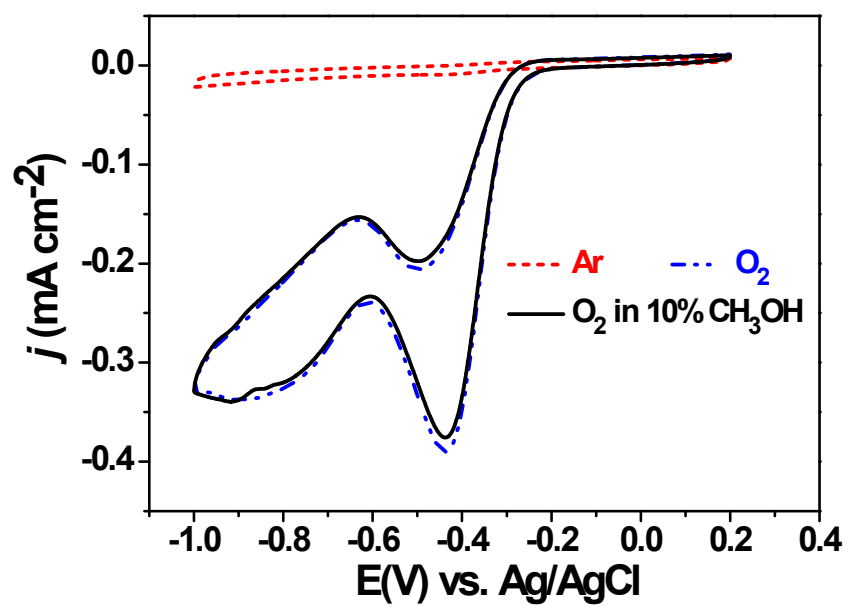

**Fig. S3** Typical cyclic voltammogram for ORR at the bare glassy carbon electrode in an Ar-saturated 0.1 M KOH, O<sub>2</sub>-saturated 0.1 M KOH, and O<sub>2</sub>-saturated 10% (v/v) CH<sub>3</sub>OH solutions.

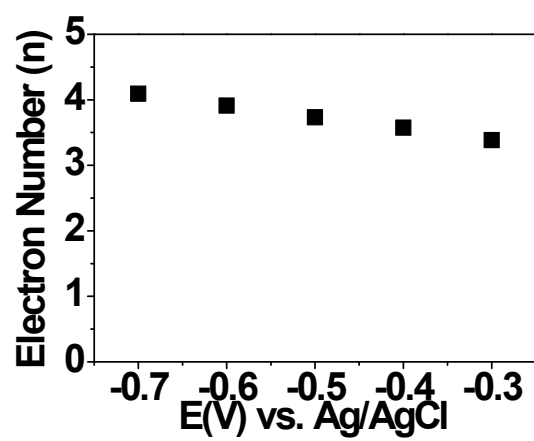

Fig. S4 The dependence of  $n$  on potential for the N-CDs/G electrode.

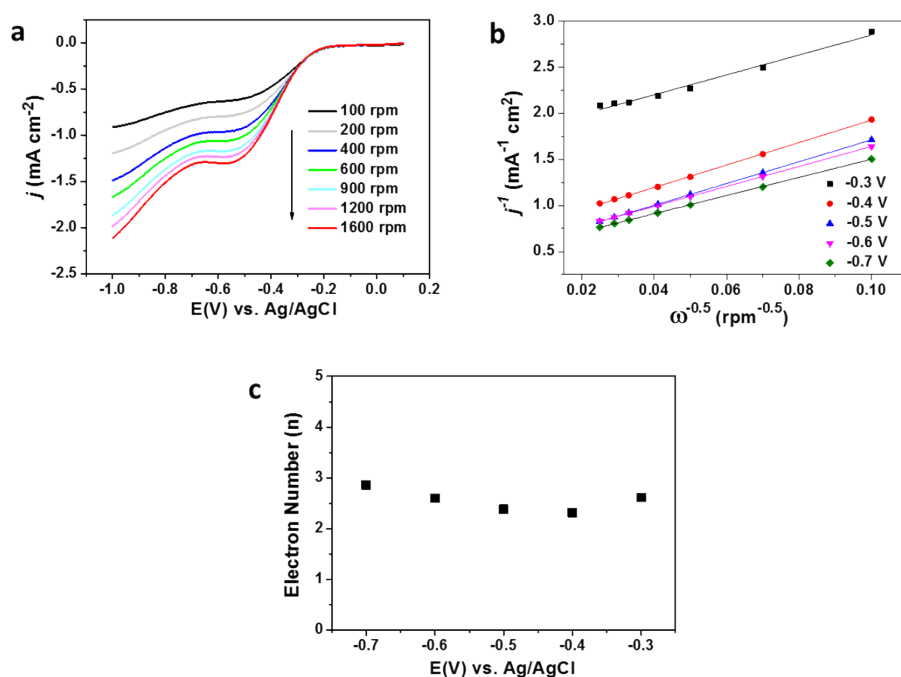

**Fig. S5** Electrocatalytic performance of the rGO. (a) RDE voltammograms of the rGO electrode in O<sub>2</sub>-saturated 0.1 M KOH with a sweep rate of 10 mV s<sup>-1</sup> at different rotation rates. (b) Corresponding K-L plots of  $j^{-1}$  versus  $\omega^{-0.5}$  at the electrode potentials of -0.3, -0.4, -0.5, -0.6, and -0.7 V. (c) The dependence of  $n$  on potential. The experimental data was obtained from (b).



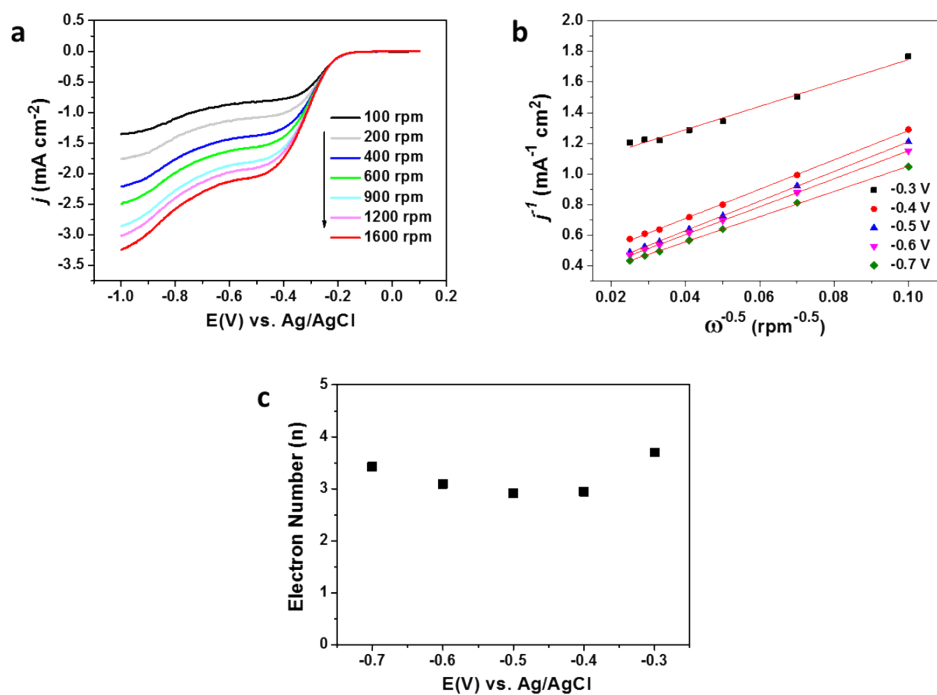

**Fig. S6** Electrocatalytic performance of the CDs/G hybrid. (a) RDE voltammograms of the CDs/G electrode in O<sub>2</sub>-saturated 0.1 M KOH with a sweep rate of 10 mV s<sup>-1</sup> at different rotation rates. (b) Corresponding K-L plots of  $j^{-1}$  versus  $\omega^{-0.5}$  at the electrode potentials of -0.3, -0.4, -0.5, -0.6, and -0.7 V. (c) The dependence of  $n$  on potential. The experimental data was obtained from (b)

**Table S1** Analysis data of the coal sample

| Coal  | Proximate analysis (wt.%) |                |                  | Ultimate analysis (daf, wt.%) |      |      |      |      |
|-------|---------------------------|----------------|------------------|-------------------------------|------|------|------|------|
|       | M <sub>ad</sub>           | A <sub>d</sub> | V <sub>daf</sub> | C                             | H    | N    | S    | O*   |
| Taixi | 1.16                      | 3.11           | 4.54             | 93.73                         | 1.32 | 1.42 | 0.23 | 3.30 |

\* by difference
